# Supplementary material
Source: Copernicus journal article supplement (doi:10.5194/nhess-26-2637-2026)
Supplement: Supplementary file 1 [file nhess-26-2637-2026-supplement.pdf]

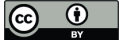

*Supplement of*

## **Quantifying the current and future likelihood of the 2022 extreme wildfire weather conditions in France with anthropogenic climate change**

**Shengling Zhu et al.**

*Correspondence to:* Shengling Zhu ([shengling.zhu@inrae.fr](mailto:shengling.zhu@inrae.fr))

The copyright of individual parts of the supplement might differ from the article licence.

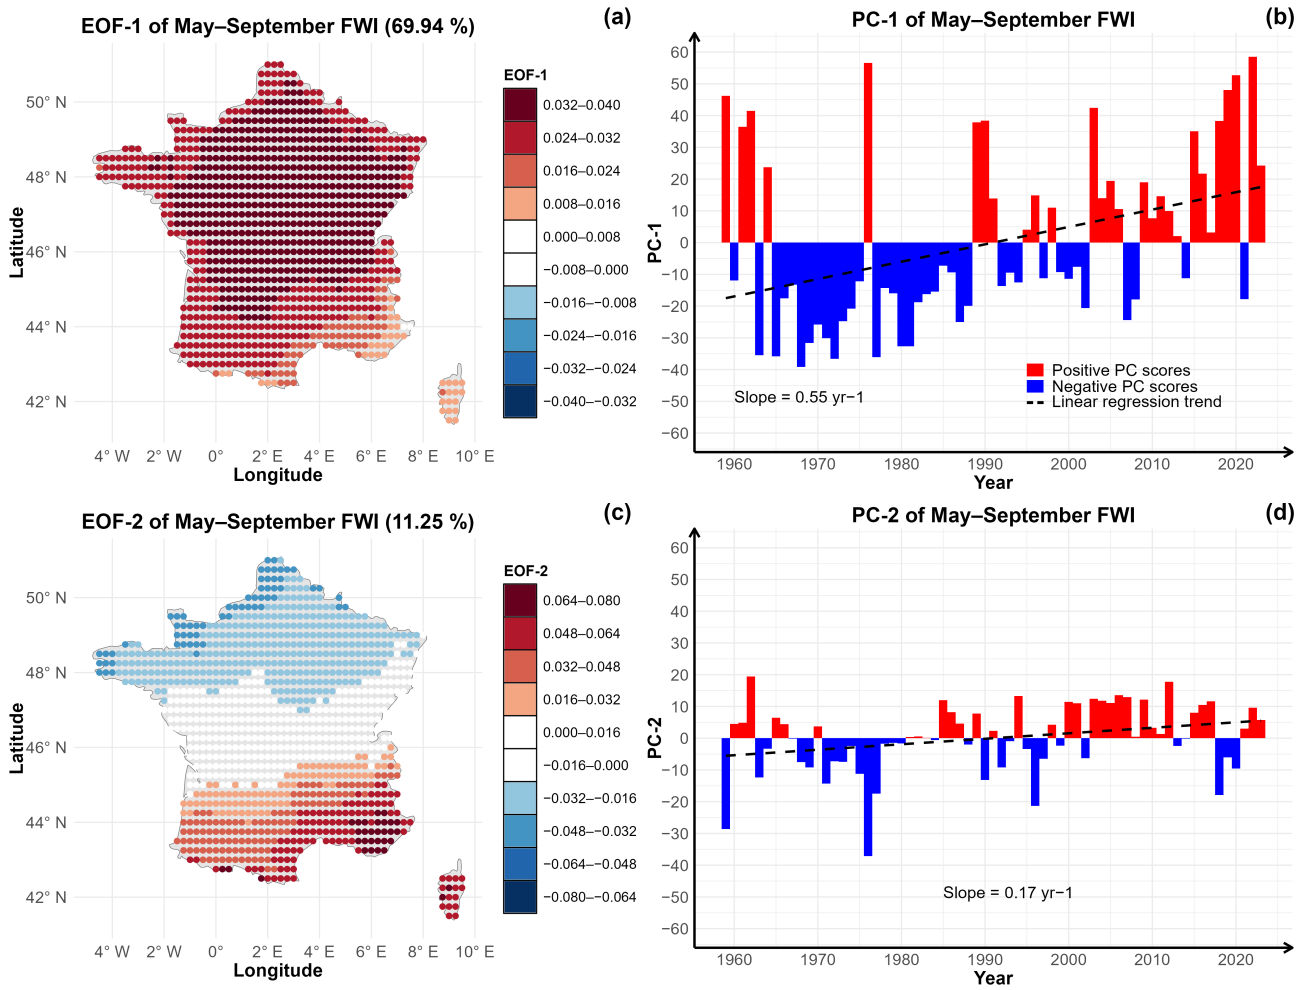

**Figure S1.** Same as Fig. 3 except that the Fire Weather Index (FWI) was derived from the ERA5 dataset.

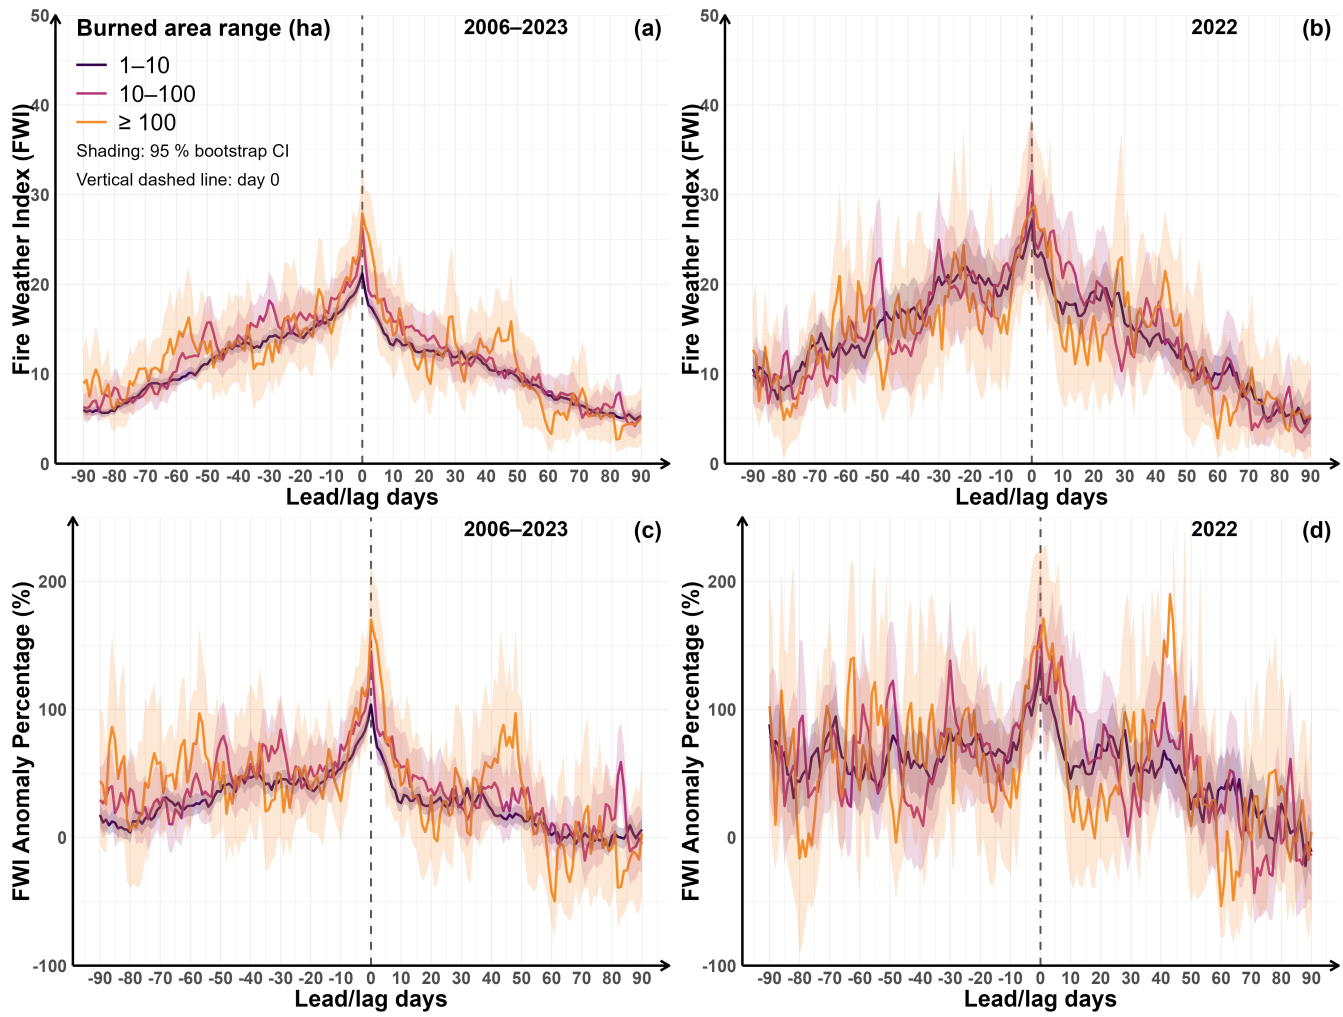

**Figure S2.** Same as Fig. 4 except that the Fire Weather Index (FWI) was derived from the ERA5 dataset.

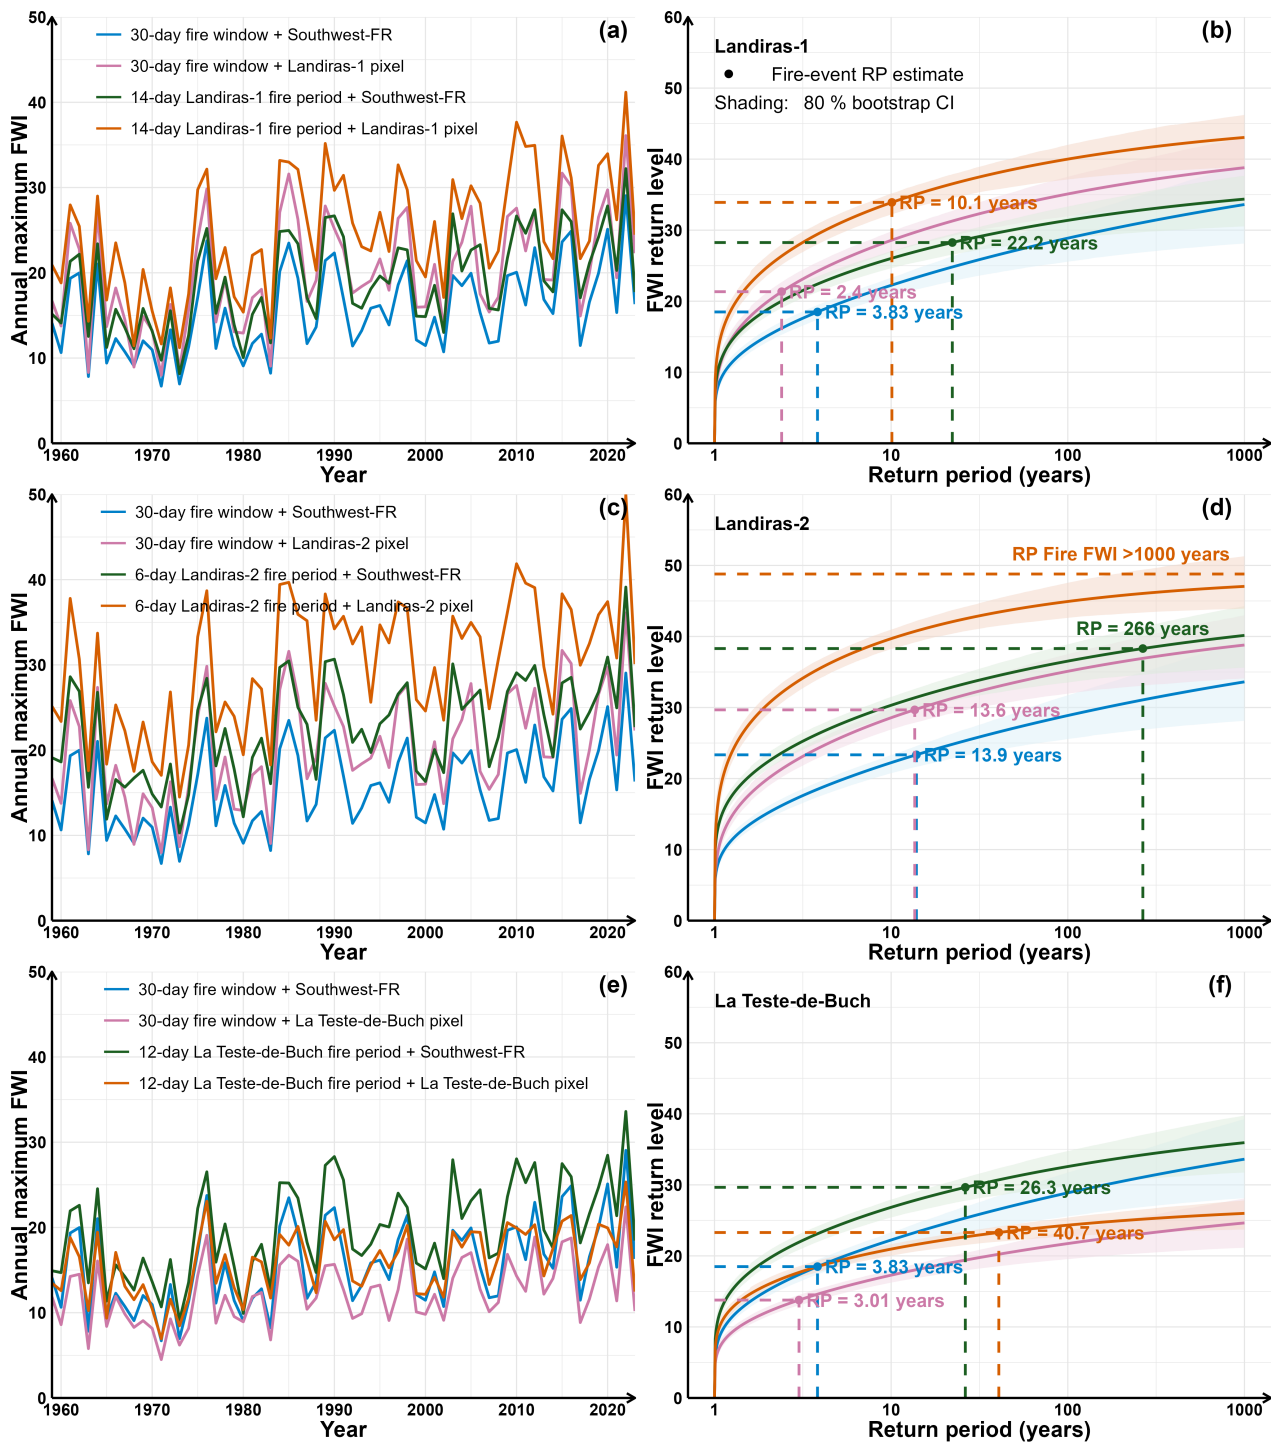

Figure S3. Same as Fig. 5 except that the Fire Weather Index (FWI) was derived from the ERA5 dataset.

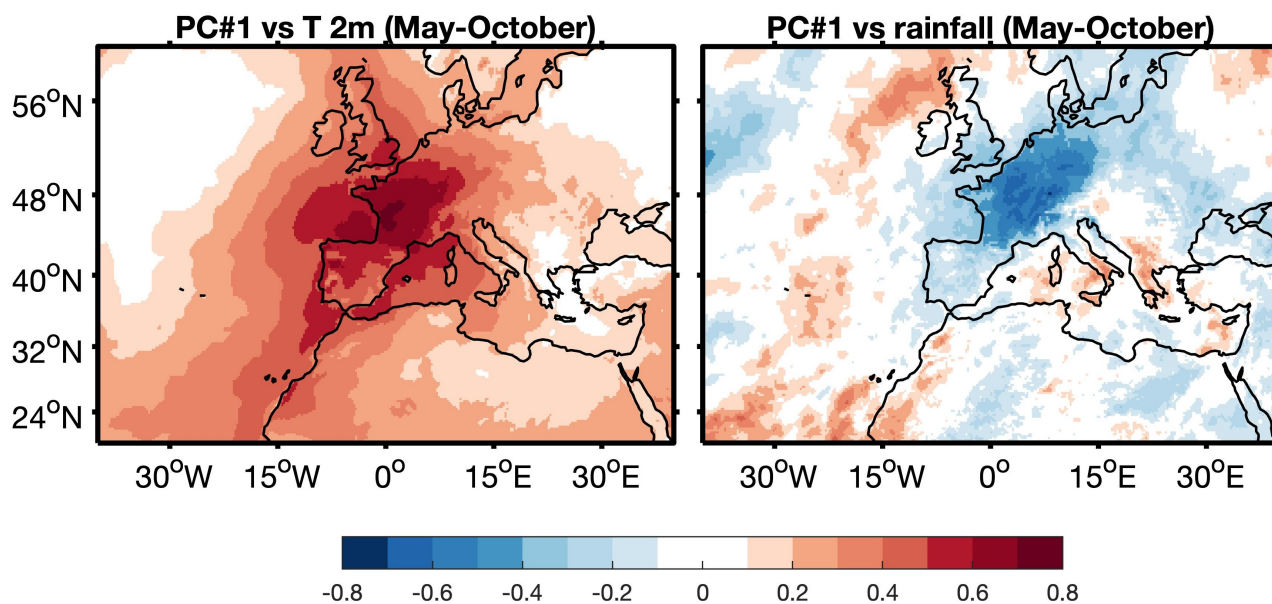

**Figure S4.** Correlations between the first principal component (PC1) of the May-October Fire Weather Index (FWI) over France and large-scale temperature (left) and rainfall (right).

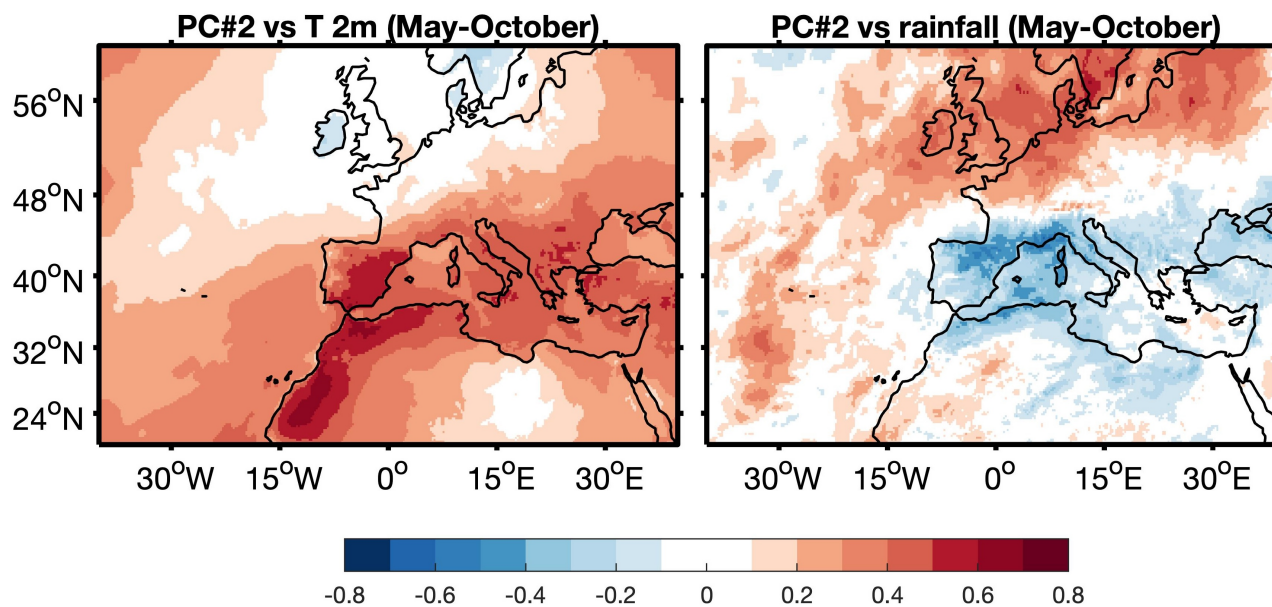

**Figure S5.** Same as Fig. S4 but for the second principal component (PC2).

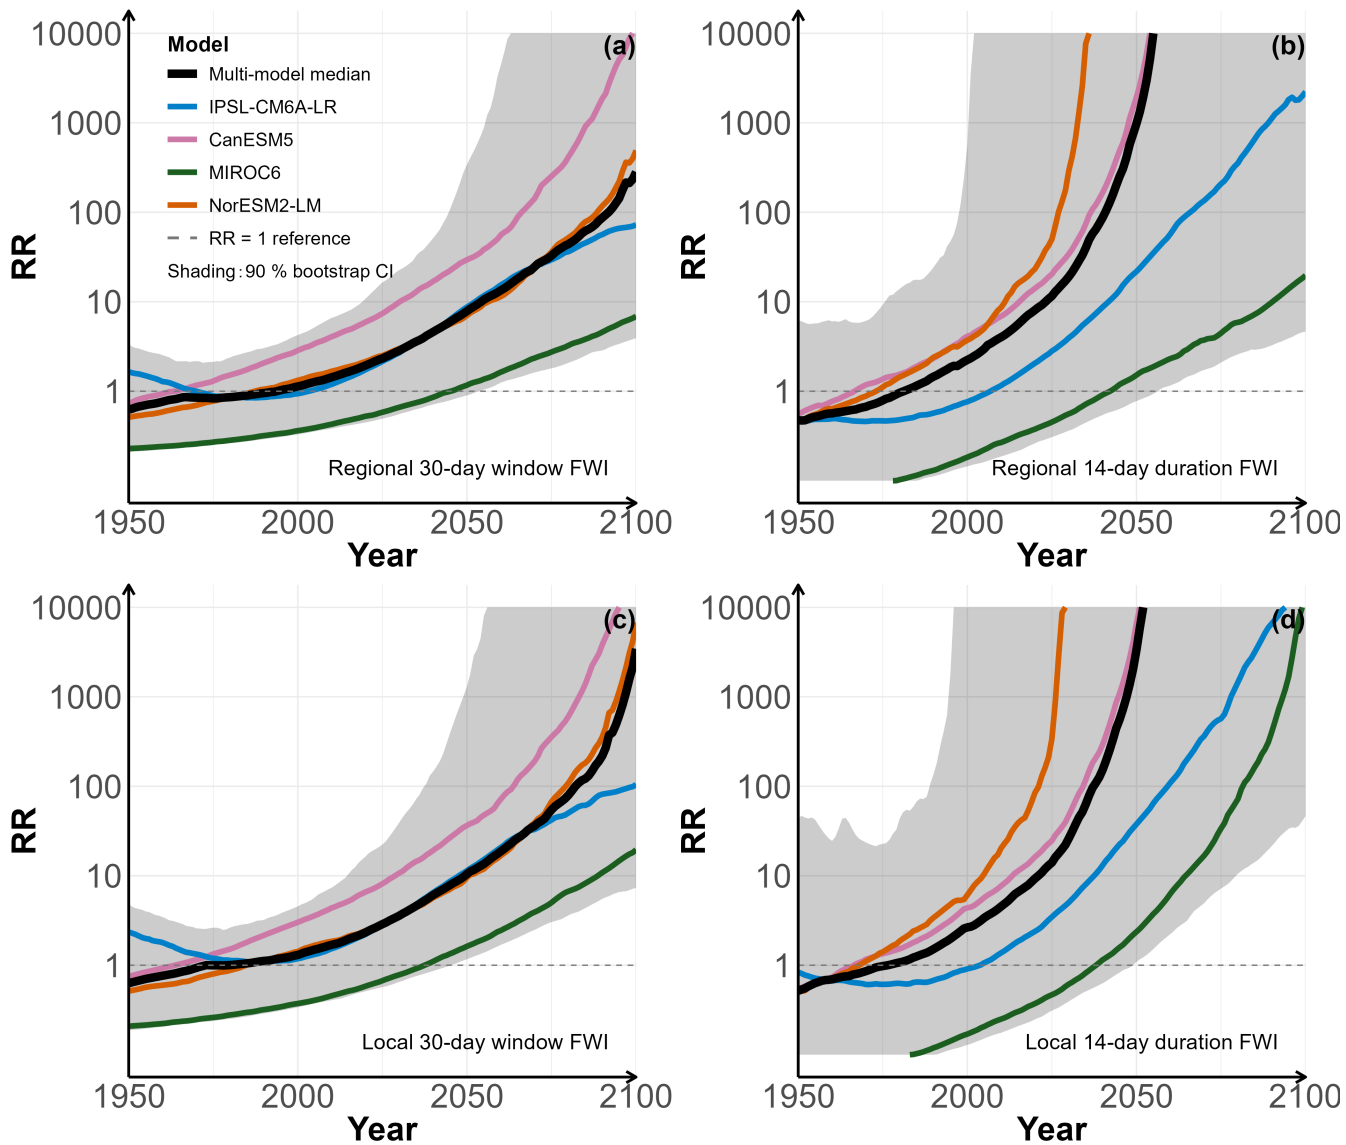

**Figure S6.** Same as Fig. 7 except that the uncertainty range was computed for the multi-model median RR. For each year, the grey shaded envelope denotes the corresponding 5th–95th percentile range of the pooled bootstrap replicates from four models ( $4 \times 100 = 400$  samples). This pooled range reflects both within-model sampling uncertainty and inter-model spread.
